# Supplementary material for: Probing the Role of the Hinge Segment of Cytochrome P450 Oxidoreductase in the Interaction with Cytochrome P450
Source: PubMed Central journal article supplement (PMC6321550; doi:10.3390/ijms19123914), 2018-12-06
Supplement: ijms-19-03914-s001.pdf [file ijms-19-03914-s001.pdf]

## Supplemental Material

### PROBING THE ROLE OF THE HINGE SEGMENT OF CYTOCHROME P450 OXIDOREDUCTASE IN THE INTERACTION WITH CYTOCHROME P450

Diana Campelo<sup>1</sup>, Francisco Esteves<sup>1</sup>, Bernardo Brito Palma<sup>1</sup>, Bruno Costa Gomes<sup>1</sup>, José Rueff<sup>1</sup>, Thomas Lautier<sup>2</sup>, Philippe Urban<sup>2</sup>, Gilles Truan<sup>2</sup> and Michel Kranendonk<sup>1\*</sup>

<sup>1</sup> Center for Toxicogenomics and Human Health, Genetics, Oncology and Human Toxicology, NOVA Medical School, Faculdade de Ciências Médicas, Universidade Nova de Lisboa, Lisbon, Portugal.

<sup>2</sup> LISBP, Université de Toulouse, CNRS, INRA, INSA, Toulouse, France.

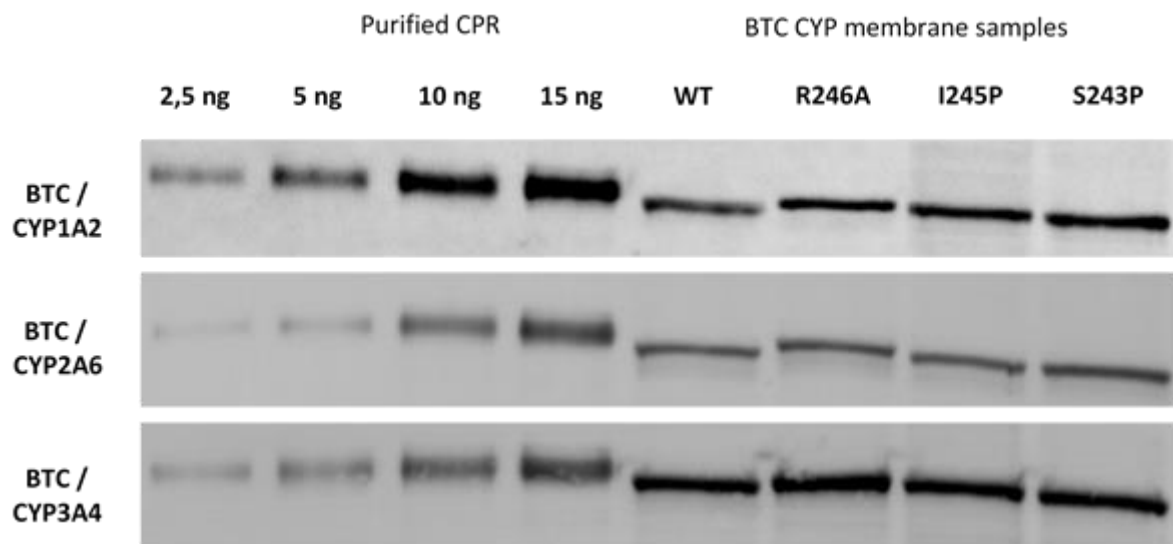

**Supplemental Figure S1:** Immuno-detection of human CPR variants in membrane preparations.

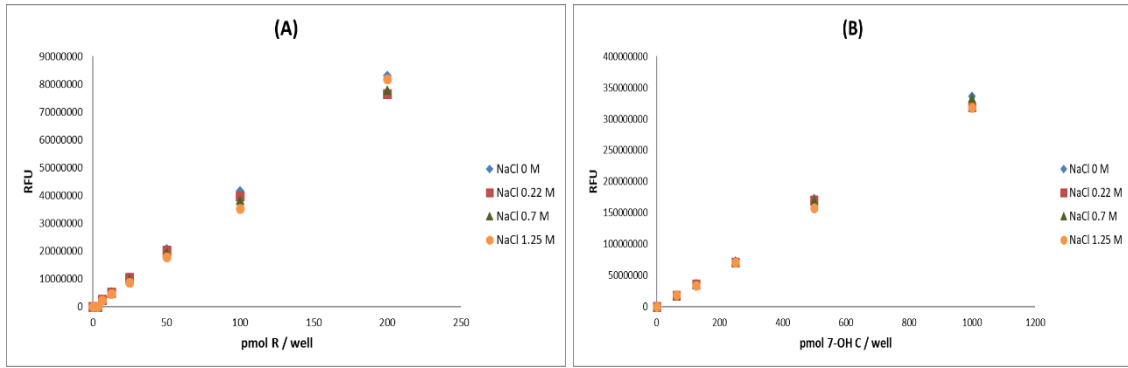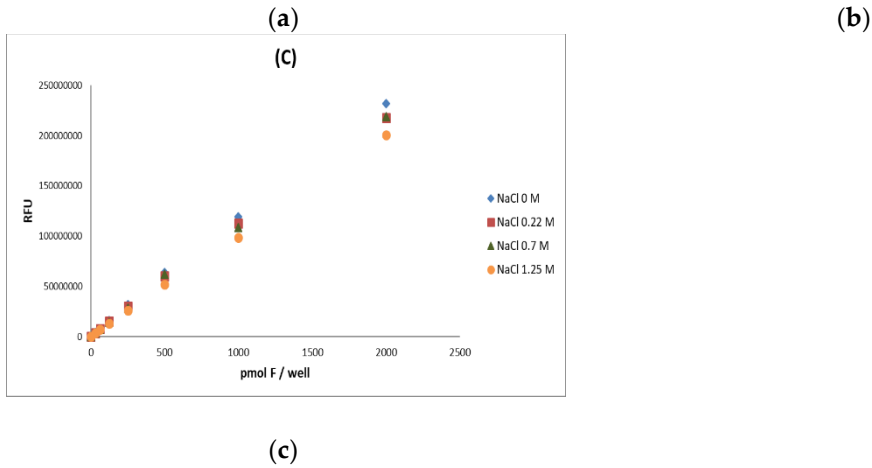

**Supplemental Figure S2:** Fluorescence of resorufin (R), 7-OH coumarin (7-OH C) and fluorescein (F) with increasing NaCl concentrations, in panel A, B and C, respectively.
